# Supplementary material for: Impact of obese levels on the hepatic expression of nuclear receptors and drug-metabolizing enzymes in adult and offspring mice
Source: PubMed Central journal article supplement — Acta Pharm Sin B. 2019 Nov 28;10(1):171–85. doi: 10.1016/j.apsb.2019.10.009 (PMC6976990; doi:10.1016/j.apsb.2019.10.009), 2019-11-28
Supplement: mmc2.pdf [file mmc2.pdf]

## Supporting Information for

### Original article

## Impact of obese levels on the hepatic expression of nuclear receptors and drug-metabolizing enzymes in adult and offspring mice

Pei Wang<sup>a,b</sup>, Xueyan Shao<sup>b</sup>, Yifan Bao<sup>b</sup>, Junjie Zhu<sup>c</sup>, Liming Chen<sup>b</sup>, Lirong Zhang<sup>a</sup>, Xiaochao Ma<sup>c</sup>, Xiao-bo Zhong<sup>b,\*</sup>

<sup>a</sup>Department of Pharmacology, School of Basic Medical Sciences, Zhengzhou University, Zhengzhou 450001, China

<sup>b</sup>Department of Pharmaceutical Sciences, School of Pharmacy, University of Connecticut, Storrs, CT 06269, USA

<sup>c</sup>Department of Pharmaceutical Sciences, School of Pharmacy, University of Pittsburgh, PA 15261, USA

Received 19 June 2019; received in revised form 30 August 2019; accepted 18 September 2019

\*Corresponding author. Tel.: +1 860 486 3697; fax: +1 860 486 5792.

E-mail address: xiaobo.zhong@uconn.edu (Xiao-bo Zhong).

**Table S1** Terminal body weight of C57BL/6 mice treated by a LFD or HFD for different durations.

| Feeding duration | Male                   |                           | Female                 |                         |
|------------------|------------------------|---------------------------|------------------------|-------------------------|
|                  | LFD                    | HFD                       | LFD                    | HFD                     |
| 4 weeks          | 24.38 ± 0.71<br>(100%) | 24.67 ± 0.79<br>(101%)    | 17.94 ± 0.80<br>(100%) | 19.83 ± 1.06<br>(111%)  |
| 8 weeks          | 27.41 ± 1.28<br>(100%) | 32.73 ± 3.95*<br>(119%)   | 20.25 ± 0.72<br>(100%) | 23.37 ± 2.71*<br>(115%) |
| 18 weeks         | 31.44 ± 1.06<br>(100%) | 48.48 ± 2.48***<br>(154%) | 27.41 ± 1.28<br>(100%) | 32.73 ± 3.95*<br>(119%) |

Results are expressed as mean ± SD.

All data were analyzed by an unpaired Student's *t*-test. \*  $P < 0.05$ , \*\*\*  $P < 0.001$ , HFD versus the corresponding LFD groups.

HFD, high-fat diet; LFD, low-fat diet; SD, standard deviation.

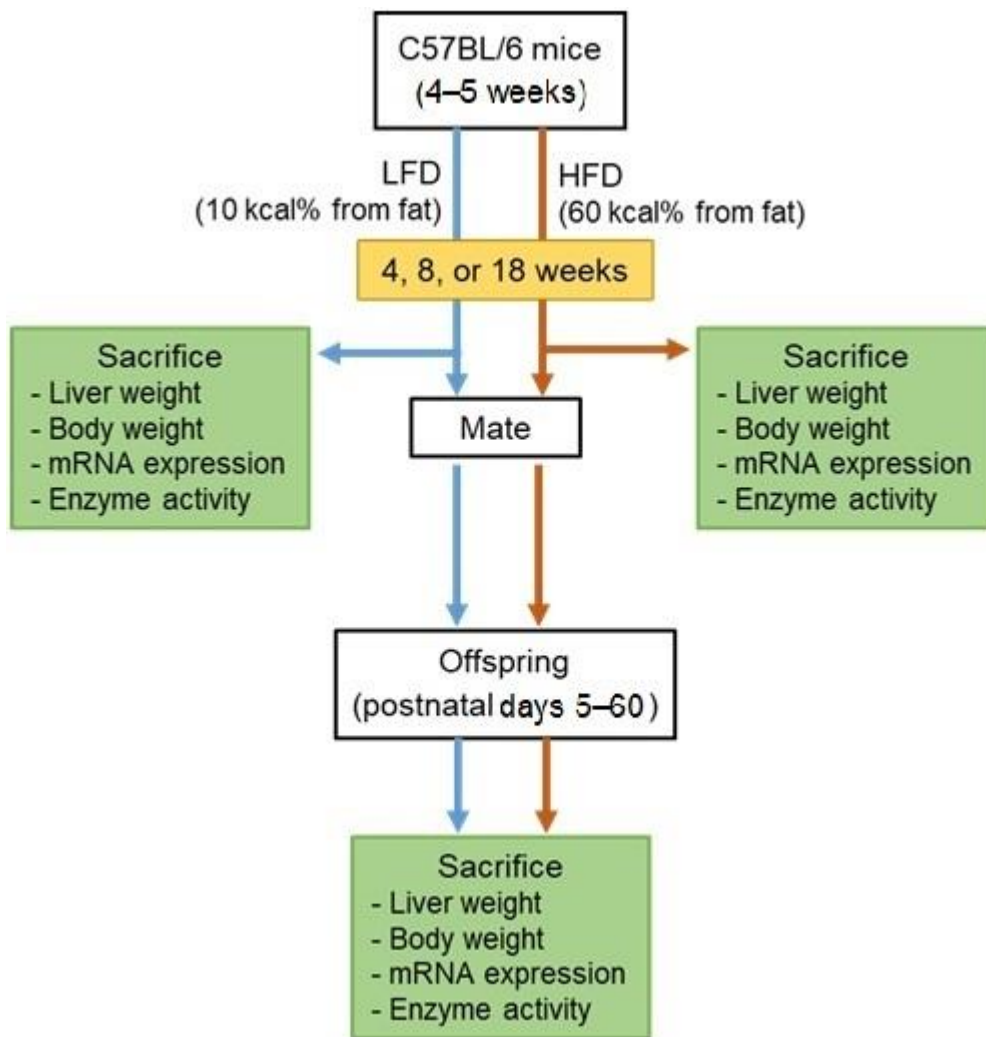

**Figure S1** A flow chart for the experimental design of the current study. Male and female C57BL/6 mice (4–5 weeks) were fed with a LFD containing 10 kcal% from fat (left) or a HFD containing 60 kcal% from fat (right) for different durations (4, 8, or 18 weeks) where some of the mice were sacrificed and liver tissues were collected to detect the gene expression levels. The remaining LFD or HFD mice were mated and maintained on the LFD or HFD, respectively. Offspring derived from these mice were sacrificed at different ages (days 5–60 after birth). All the offspring mice were provided with the same diet as their parental mice.
